# Supplementary material
Source: MDPI journal article supplement (https://www.mdpi.com/2071-1050/11/22/6304)
Supplement: s1 [file s1]

## Supplementary material

**Table S1.** Mean values and standard error of the means of einkorn, emmer and rivet entries in 2016/17 and 2017/18. Cover at GS31 = crop canopy cover at the onset of stem extension; Foliar diseases = severity of foliar diseases at full anthesis (BBCH GS65); Height = canopy height after full anthesis. LSD = Tukey's honestly significant difference based on linear model accounting for the effect of entry over the variable of interest.

|                      | Cover at GS31 (%)    |            | Foliar diseases (%) |                    | Height (cm)         |             | Ear density (ears/m <sup>2</sup> ) |              | Grain yield (t/ha)   |             |
|----------------------|----------------------|------------|---------------------|--------------------|---------------------|-------------|------------------------------------|--------------|----------------------|-------------|
|                      | 2015/16              | 2016/17    | 2015/16             | 2016/17            | 2015/16             | 2016/17     | 2015/16                            | 2016/17      | 2015/16              | 2016/17     |
| <b>Einkorn</b>       |                      |            |                     |                    |                     |             |                                    |              |                      |             |
| COL 112              | 39.0 ± 4.5           | 32.0 ± 6.6 | 1.0 ± 0.2           | 4.0 ± 0.5          | 87.3 ± 3.5          | 130.1 ± 1.5 | 309.6 ± 55.9                       | 404.3 ± 32.7 | 1.21 ± 0.17          | 3.47 ± 0.30 |
| Einkorn CCP          | 35.0 ± 2.5           | 30.0 ± 7.5 | 2.0 ± 0.3           | 4.0 ± 0.3          | 94.5 ± 1.9          | 132.0 ± 4.2 | 332.7 ± 24.9                       | 401.1 ± 68.0 | 1.06 ± 0.15          | 3.32 ± 0.15 |
| Mv Alkor             | 60.0 ± 3.5           | 28.0 ± 6.3 | 2.0 ± 0.4           | 5.0 ± 0.6          | 103.2 ± 0.6         | 114.7 ± 7.5 | 440.4 ± 22.5                       | 416.7 ± 69.1 | 1.76 ± 0.09          | 3.12 ± 0.19 |
| Mv Menket            | 35.0 ± 2.5           | 18.0 ± 3.1 | 1.0 ± 0.4           | 5.0 ± 4.2          | 66.8 ± 1.1          | 84.0 ± 6.7  | 228.9 ± 34.1                       | 320.0 ± 78.4 | 0.67 ± 0.12          | 2.23 ± 0.46 |
| Nödik Alakor         | 68.0 ± 2.6           | 25.0 ± 6.1 | 2.0 ± 0.4           | 17.0 ± 2.5         | 103.1 ± 5.6         | 113.3 ± 4.6 | 436.5 ± 24.1                       | 460.0 ± 77.6 | 1.72 ± 0.11          | 3.52 ± 0.42 |
| <i>LSD</i>           | 16.0                 | 32.0       | 2.0                 | 6.0                | 4.4                 | 4.8         | 174.6                              | 331.7        | 0.66                 | 1.35        |
| <i>Mean Sq Error</i> | 0.53                 | 1.45       | 5.7e <sup>-3</sup>  | 0.05               | 18.7                | 3.19        | 6390.8                             | 15237.3      | 0.0911               | 0.25        |
| <b>Emmer</b>         |                      |            |                     |                    |                     |             |                                    |              |                      |             |
| Mv Heyges            | 26.7 ± 3.5           | 45.0 ± 2.0 | 34.5 ± 3.5          | 7.5 ± 5.0          | 88.5 ± 5.6          | 132.7 ± 2.6 | 130.8 ± 29.4                       | 243.3 ± 13.4 | 0.57 ± 0.07          | 2.13 ± 0.04 |
| Nödik Tonke          | 36.7 ± 2.9           | 45.0 ± 2.4 | 35.0 ± 2.9          | 27.4 ± 3.1         | 99.2 ± 3.8          | 124.2 ± 2.7 | 170.3 ± 29.1                       | 249.9 ± 20.7 | 0.67 ± 0.07          | 2.87 ± 0.49 |
| Weisser              | 30.0 ± 0.0           | 47.0 ± 4.1 | 37.0 ± 7.4          | 14.6 ± 4.4         | 91.9 ± 11.8         | 131.7 ± 1.3 | 148.2 ± 9.3                        | 167.8 ± 24.4 | 0.60 ± 0.09          | 1.72 ± 0.30 |
| <i>LSD</i>           | 9.3                  | 13.0       | 13.0                | 16.4               | 16.5                | 6.4         | 102.9                              | 107.1        | 0.32                 | 1.62        |
| <i>Mean Sq Error</i> | 0.14                 | 0.28       | 0.27                | 0.43               | 43.59               | 6.49        | 1688.6                             | 1827.1       | 0.016                | 0.42        |
| <b>Rivet</b>         |                      |            |                     |                    |                     |             |                                    |              |                      |             |
| Gigante LN           | 30.0 ( <i>n.a.</i> ) | 50.0 ± 9.0 | 8.0 ( <i>n.a.</i> ) | 3.4 ± 0.3          | 139 ( <i>n.a.</i> ) | 133.1 ± 2.1 | <i>n.a.</i>                        | 187.8 ± 26.1 | 0.85 ( <i>n.a.</i> ) | 2.28 ± 0.32 |
| Blue Cone            | 55.0 ± 9.2           | 67.0 ± 6.3 | 6.5 ± 1.6           | 2.0 ± 0.2          | 105.1 ± 8.8         | 137.6 ± 2.6 | <i>n.a.</i>                        | 253.3 ± 29.2 | 0.98 ± 0.22          | 2.89 ± 0.15 |
| Rampton              | 27.0 ± 2.1           | 62.0 ± 4.9 | 5.3 ± 0.8           | 2.3 ± 0.2          | 78.5 ± 2.8          | 141.3 ± 2.7 | <i>n.a.</i>                        | 178.9 ± 20.0 | 0.45 ± 0.12          | 3.56 ± 0.57 |
| <i>LSD</i>           | <i>n.a.</i>          | 32.0       | <i>n.a.</i>         | 1.2                | <i>n.a.</i>         | 13.6        | <i>n.a.</i>                        | 114.5        | <i>n.a.</i>          | 2.03        |
| <i>Mean Sq Error</i> | 0.30                 | 1.66       | 0.06                | 2.4e <sup>-3</sup> | 64.91               | 29.38       |                                    | 2087.7       | 0.086                | 0.66        |

**Table S2.** Linear mixed-effect model analysis of the effect of rotational position (Field), tillage system, entry, field-by-entry and field-by-tillage interaction over agronomic parameters in 2017-18 for einkorn, emmer and rivet wheat. (Cover at GS22 = canopy cover during tillering; Cover at GS31 = canopy cover at the onset of stem extension). Chi-square ( $X^2$ ) and p-values are obtained through the likelihood ratio test between models with and without the effect of interest. Individual fixed effects were progressively added in the other they appear.

|                          |         | Fixed effects |          |             |                |                  |
|--------------------------|---------|---------------|----------|-------------|----------------|------------------|
| Variable                 |         | Field         | Tillage  | Entry       | Field-by-Entry | Tillage-by-Entry |
| <b>Einkorn</b>           | (d.f.)  | (1)           | (1)      | (3)         | (3)            | (3)              |
| Cover at GS22            | $X^2$   | 6.419         | 1.886    | 19.252      | 4.420          | 0.914            |
|                          | p-value | 0.0113*       | 0.1697   | 2.00E-04*** | 0.2196         | 0.822            |
| Cover at GS31            | $X^2$   | 7.172         | 10.631   | 4.991       | 1.343          | 6.120            |
|                          | p-value | 0.0074**      | 0.0011** | 0.1725      | 0.7189         | 0.1059           |
| Height at maturity       | $X^2$   | 1.748         | 2.873    | 14.675      | 0.889          | 4.160            |
|                          | p-value | 0.1861        | 0.0901   | 2.10E-03*** | 0.8281         | 0.2447           |
| Ear density              | $X^2$   | 6.585         | 3.209    | 4.190       | 6.433          | 3.096            |
|                          | p-value | 0.0103*       | 0.07325  | 0.24        | 0.0924         | 0.377            |
| Diseases severity (sqrt) | $X^2$   | 5.906         | 0.125    | 3.635       | 4.450          | 5.680            |
|                          | p-value | 0.0151*       | 0.7233   | 0.3037      | 0.2168         | 0.1283           |
| Grain Yield              | $X^2$   | 2.296         | 1.678    | 1.628       | 1.735          | 7.181            |
|                          | p-value | 0.1297        | 0.1952   | 0.6534      | 0.6291         | 0.0664           |
| <b>Emmer</b>             | (d.f.)  | (1)           | (1)      | (2)         | (2)            | (2)              |
| Cover during tillering   | $X^2$   | 0.004         | 2.544    | 1.646       | 4.090          | 16.140           |
|                          | p-value | 0.9488        | 0.1107   | 4.39E-01*** | 0.1294         | 0.0003           |
| Cover at GS31            | $X^2$   | 0.894         | 0.346    | 11.403      | 3.181          | 0.229            |
|                          | p-value | 0.3602        | 0.5567   | 0.0033**    | 0.2039         | 0.8917           |
| Height at maturity       | $X^2$   | 81.910        | 4.051    | 16.929      | 0.347          | 1.436            |
|                          | p-value | 2.20E-16***   | 0.0442   | 2.00E-04*** | 0.8405         | 0.187            |
| Ear density              | $X^2$   | 1.292         | 0.090    | 4.359       | 1.001          | 1.668            |
|                          | p-value | 0.2557        | 0.7643   | 0.11        | 0.606          | 0.4342           |
| Diseases severity (sqrt) | $X^2$   | 4.769         | 2.129    | 0.206       | 1.206          | 0.588            |
|                          | p-value | 0.0289*       | 0.1445   | 0.9020      | 0.5470         | 0.7450           |
| Grain Yield              | $X^2$   | 0.437         | 0.340    | 1.067       | 2.438          | 2.896            |
|                          | p-value | 0.5088        | 0.5600   | 0.5860      | 0.2950         | 0.2350           |
| <b>Rivet</b>             | (d.f.)  | (1)           | (1)      | (2)         | (2)            | (2)              |
| Cover during tillering   | $X^2$   | 0.024         | 4.495    | 3.613       | 0.215          | 0.662            |
|                          | p-value | 0.8773        | 0.0340*  | 0.1643      | 0.8982         | 0.7181           |
| Cover at GS31            | $X^2$   | 3.330         | 0.268    | 8.388       | 0.172          | 3.527            |
|                          | p-value | 0.0680        | 0.6047   | 0.0151*     | 0.9178         | 0.1710           |
| Height at maturity       | $X^2$   | 1.943         | 2.072    | 2.245       | 1.807          | 10.625           |
|                          | p-value | 0.1634        | 0.1500   | 0.3250      | 0.4050         | 0.0049**         |
| Ear density              | $X^2$   | 1.546         | 2.446    | 6.505       | 0.022          | 0.602            |
|                          | p-value | 0.2167        | 0.1178   | 0.0387*     | 0.9890         | 0.7402           |

|                 |                |        |        |           |        |          |
|-----------------|----------------|--------|--------|-----------|--------|----------|
| Diseases        | X <sup>2</sup> | 2.618  | 0.101  | 15.237    | 0.605  | 13.462   |
| severity (sqrt) | p-value        | 0.1056 | 0.7505 | 0.0005*** | 0.7390 | 0.0012** |
| Grain Yield     | X <sup>2</sup> | 2.046  | 0.345  | 0.410     | 1.449  | 6.357    |
|                 | p-value        | 0.1527 | 0.5570 | 0.8147    | 0.4850 | 0.0417*  |

(sqrt) = values are square-root transformed to better fit with normality and homoscedasticity conditions

**Table S3.** Linear mixed-effect model analysis of the effect of rotational position (Field), tillage system, entry, field-by-entry and field-by-tillage interaction over grain quality parameters in 2017/18 for einkorn, emmer and rivet wheat. Chi-square ( $X^2$ ) and p-values are obtained through the likelihood ratio test between models with and without the effect of interest. Individual fixed effects were progressively added in the other they appear.

| Fixed effects       |         |             |         |             |                |                  |
|---------------------|---------|-------------|---------|-------------|----------------|------------------|
| Variable            |         | Field       | Tillage | Entry       | Field-by-Entry | Tillage-by-Entry |
| <b>Einkorn</b>      | (d.f.)  | (1)         | (1)     | (3)         | (3)            | (3)              |
| Protein content     | $X^2$   | 13.82       | 1.85    | 4.42        | 1.09           | 4.04             |
|                     | p-value | 0.0002***   | 0.1736  | 0.2199      | 0.7794         | 0.1272           |
| Total dietary fibre | $X^2$   | 1.32        | 0.83    | 13.50       | 1.89           | 3.37             |
|                     | p-value | 0.2507      | 0.3223  | 0.0037**    | 0.5948         | 0.3377           |
| Fat content         | $X^2$   | 6.45        | 0.12    | 5.36        | 6.39           | 6.20             |
|                     | p-value | 0.0111*     | 0.7322  | 0.1474      | 0.0939         | 0.1023           |
| Total Polyphenols   | $X^2$   | 20.66       | 0.21    | 7.34        | 5.46           | 6.84             |
|                     | p-value | 5.47E-06*** | 0.6470  | 0.0619      | 0.1410         | 0.0770           |
| Total Flavonoids    | $X^2$   | 3.06        | 6.33    | 5.24        | 9.72           | 4.54             |
|                     | p-value | 0.0804      | 0.0119* | 0.1553      | 0.0211*        | 0.2088           |
| FRAP                | $X^2$   | 21.96       | 1.93    | 2.89        | 6.09           | 18.00            |
|                     | p-value | 2.77E-06*** | 0.1649  | 0.4091      | 0.1072         | 0.0004***        |
| DPPH                | $X^2$   | 12.29       | 1.46    | 9.02        | 5.07           | 2.13             |
|                     | p-value | 0.0005***   | 0.2271  | 0.0290*     | 0.1666         | 0.5463           |
| <b>Emmer</b>        | (d.f.)  | (1)         | (1)     | (2)         | (2)            | (2)              |
| Protein content     | $X^2$   | 2.090       | 5.411   | 8.997       | 7.327          | 1.455            |
|                     | p-value | 0.1483      | 0.0200* | 0.0111*     | 0.0256*        | 0.4831           |
| Total dietary fibre | $X^2$   | 0.628       | 0.006   | 3.045       | 9.493          | 6.908            |
|                     | p-value | 0.4282      | 0.9404  | 0.2180      | 0.0087**       | 0.0316*          |
| Fat content (sqrt)  | $X^2$   | 10.633      | 1.100   | 20.420      | 24.315         | 8.186            |
|                     | p-value | 0.0011**    | 0.2945  | 3.68E-05*** | 5.24E-06***    | 0.0167*          |
| Total Polyphenols   | $X^2$   | 4.092       | 1.046   | 0.902       | 34.124         | 1.257            |
|                     | p-value | 0.0431*     | 0.3065  | 0.6371      | 3.89E-08***    | 0.5334           |
| Total Flavonoids    | $X^2$   | 4.066       | 11.641  | 12.306      | 5.098          | 14.135           |
|                     | p-value | 0.0437*     | 0.0001* | 0.0012**    | 0.0781         | 0.0009***        |
| FRAP                | $X^2$   | 2.478       | 0.035   | 1.433       | 31.686         | 10.171           |
|                     | p-value | 0.1155      | 0.8516  | 0.4885      | 1.32E-07***    | 0.0062**         |
| DPPH                | $X^2$   | 0.048       | 0.052   | 3.953       | 26.176         | 0.049            |
|                     | p-value | 0.8278      | 0.8201  | 0.1385      | 2.07E-06***    | 0.9757           |
| <b>Rivet</b>        | (d.f.)  | (1)         | (1)     | (2)         | (2)            | (2)              |
| Protein content     | $X^2$   | 6.93        | 0.10    | 14.64       | 2.87           | 8.64             |
|                     | p-value | 0.0084**    | 0.7515  | 0.0007***   | 0.2380         | 0.0133*          |
| Total dietary fibre | $X^2$   | 3.89        | 0.31    | 4.41        | 6.53           | 26.87            |
|                     | p-value | 0.0485*     | 0.5770  | 0.1101      | 0.0381*        | 1.46E-06***      |
|                     | $X^2$   | 1.90        | 0.08    | 14.20       | 6.84           | 15.47            |

|                    |          |          |        |             |         |           |
|--------------------|----------|----------|--------|-------------|---------|-----------|
| Fat content (sqrt) | p-value  | 0.1681   | 0.7826 | 0.0008***   | 0.0327* | 0.0004*** |
| Total Polyphenols  | $\chi^2$ | 0.06     | 0.02   | 24.96       | 0.12    | 0.54      |
|                    | p-value  | 0.7998   | 0.8810 | 3.81E-06*** | 0.9411  | 0.7634    |
| Total Flavonoids   | $\chi^2$ | 4.34     | 0.04   | 2.97        | 4.63    | 17.01     |
|                    | p-value  | 0.0373*  | 0.8515 | 0.2265      | 0.0987  | 0.0002*** |
| FRAP               | $\chi^2$ | 0.33     | 1.54   | 2.98        | 7.05    | 0.10      |
|                    | p-value  | 0.5645   | 0.2144 | 0.2252      | 0.0295* | 0.9527    |
| DPPH               | $\chi^2$ | 6.78     | 0.01   | 2.96        | 2.25    | 2.82      |
|                    | p-value  | 0.0092** | 0.9240 | 0.2275      | 0.3240  | 0.2440    |

(sqrt) = values are square-root transformed to better fit with normality and homoscedasticity conditions

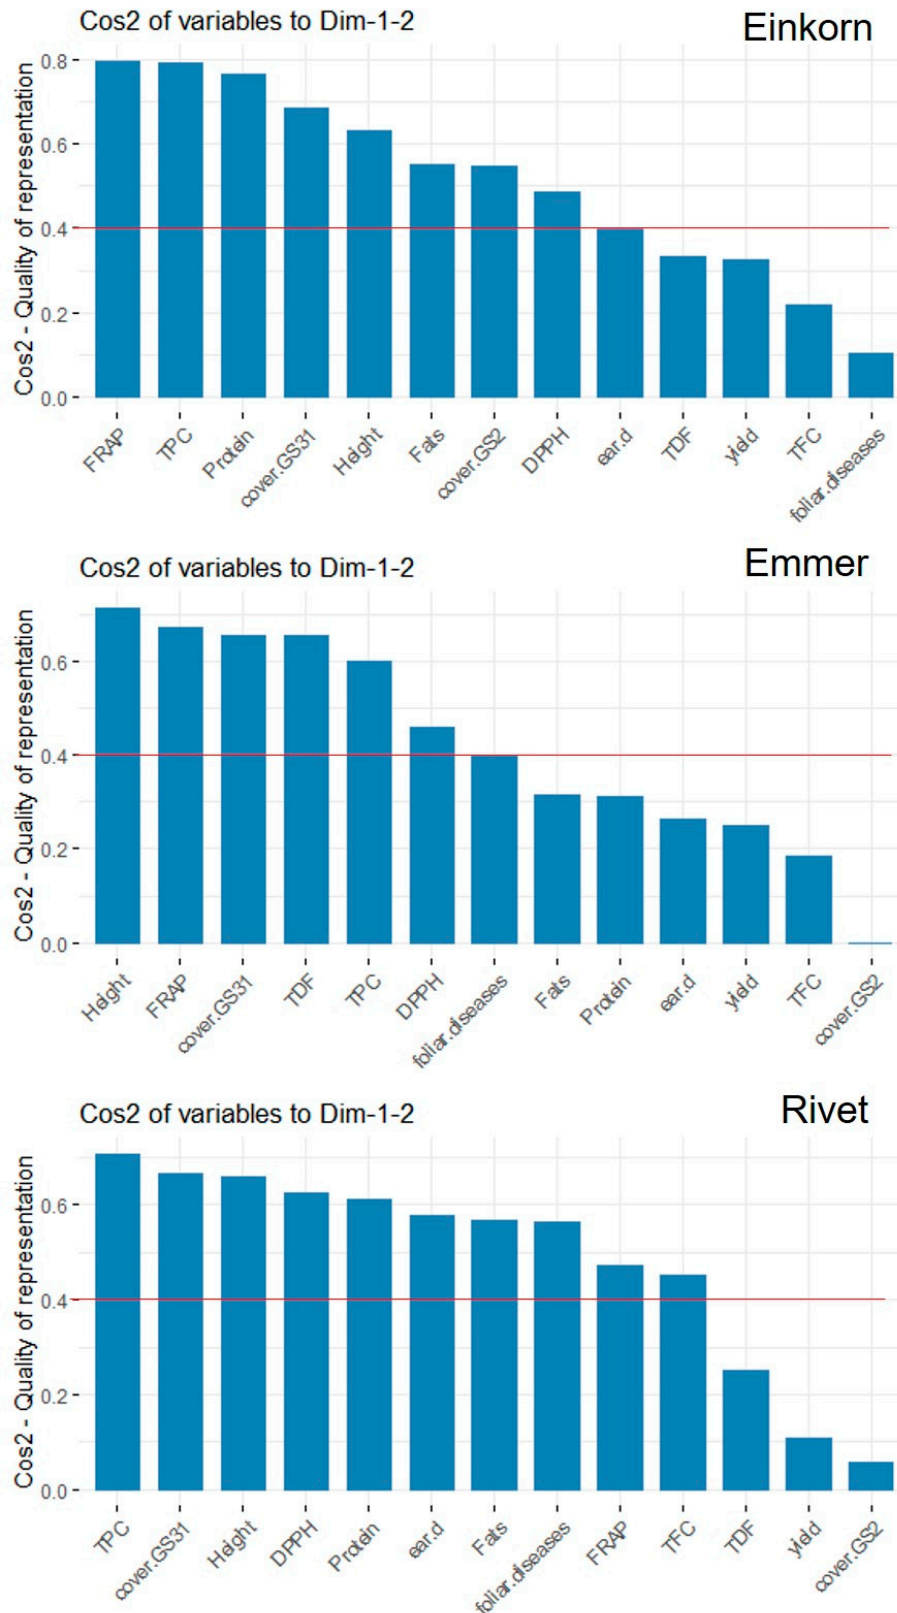

**Figure S1.** Quality of representation (Cos2) of tested variables in principal component analyses for Einkorn, Emmer and Rivet wheat. Variables with  $\text{Cos2} \geq 0.4$  were included in the PCAs presented in the paper.
